# Supplementary material for: A 424-year tree-ring-based Palmer Drought Severity Index reconstruction of Cedrus deodara D. Don from the Hindu Kush range of Pakistan: linkages to ocean oscillations
Source: Copernicus journal article supplement (doi:10.5194/cp-16-783-2020), 2020-04-29
Supplement: Supplementary file 1 [file cp-16-783-2020-supplement.zip]

Archive with 2 entries (2 files):
- cp-16-783-2020-supplement-title-page.pdf
- Supplement.docx
