# Supplementary material for: A 424-year tree-ring-based Palmer Drought Severity Index reconstruction of Cedrus deodara D. Don from the Hindu Kush range of Pakistan: linkages to ocean oscillations
Source: Copernicus journal article supplement (doi:10.5194/cp-16-783-2020), 2020-04-29
Supplement: Supplementary file 1 [file cp-16-783-2020-supplement.zip › cp-16-783-2020-supplement-title-page.pdf]

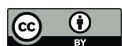

## *Supplement of*

# **A 424-year tree-ring-based Palmer Drought Severity Index reconstruction of *Cedrus deodara* D. Don from the Hindu Kush range of Pakistan: linkages to ocean oscillations**

**Sarir Ahmad et al.**

*Correspondence to:* Xiaochun Wang ([wangx@nefu.edu.cn](mailto:wangx@nefu.edu.cn)) and Shijie Han ([hansj@iae.ac.cn](mailto:hansj@iae.ac.cn))

- [cp-16-783-2020-supplement-title-page.pdf](#)
- [Supplement.docx](#)

The copyright of individual parts of the supplement might differ from the CC BY 4.0 License.
