# Supplementary material for: A 424-year tree-ring-based Palmer Drought Severity Index reconstruction of Cedrus deodara D. Don from the Hindu Kush range of Pakistan: linkages to ocean oscillations
Source: Copernicus journal article supplement (doi:10.5194/cp-16-783-2020), 2020-04-29
Supplement: Supplementary file 1 [file cp-16-783-2020-supplement.zip › Supplement.docx]

| Year | Reconstructed PDSI | Year | Reconstructed PDSI | Year | Reconstructed PDSI | Year | Reconstructed PDSI | Year | Reconstructed PDSI | Year | Reconstructed PDSI | Year | Reconstructed PDSI | Year | Reconstructed PDSI | Year | Reconstructed PDSI |
| --- | --- | --- | --- | --- | --- | --- | --- | --- | --- | --- | --- | --- | --- | --- | --- | --- | --- |
| 1591 |  | 1641 | -0.871 | 1691 | 1.399 | 1741 | -0.843 | 1791 | -1.532 | 1841 | -0.002 | 1891 | -0.609 | 1941 | -0.873 | 1991 | 0.071 |
| 1592 |  | 1642 | -1.318 | 1692 | -0.067 | 1742 | -1.593 | 1792 | -1.893 | 1842 | -0.316 | 1892 | -1.771 | 1942 | 0.006 | 1992 | 0.930 |
| 1593 | -0.367 | 1643 | 0.411 | 1693 | 1.090 | 1743 | -1.541 | 1793 | -1.468 | 1843 | -0.037 | 1893 | -1.328 | 1943 | 0.476 | 1993 | 1.060 |
| 1594 | -0.157 | 1644 | -0.846 | 1694 | 0.574 | 1744 | -1.252 | 1794 | -1.173 | 1844 | -0.756 | 1894 | -0.566 | 1944 | 0.386 | 1994 | 0.716 |
| 1595 | -0.589 | 1645 | -0.563 | 1695 | 0.859 | 1745 | -0.820 | 1795 | -1.113 | 1845 | -0.193 | 1895 | -1.454 | 1945 | -0.169 | 1995 | 0.600 |
| 1596 | -0.644 | 1646 | -1.052 | 1696 | 1.041 | 1746 | -1.660 | 1796 | -0.836 | 1846 | -0.777 | 1896 | -0.705 | 1946 | -1.652 | 1996 | 1.258 |
| 1597 | -0.569 | 1647 | -0.493 | 1697 | 0.528 | 1747 | -0.182 | 1797 | -0.734 | 1847 | -0.293 | 1897 | -0.482 | 1947 | -1.293 | 1997 | 1.092 |
| 1598 | -0.709 | 1648 | -1.154 | 1698 | 0.597 | 1748 | -0.003 | 1798 | -1.125 | 1848 | -1.213 | 1898 | -0.350 | 1948 | -1.758 | 1998 | 1.373 |
| 1599 | -1.925 | 1649 | -0.637 | 1699 | 0.141 | 1749 | -1.253 | 1799 | -0.216 | 1849 | -0.859 | 1899 | -1.217 | 1949 | -0.600 | 1999 | 0.397 |
| 1600 | -1.292 | 1650 | -1.447 | 1700 | 0.552 | 1750 | -1.571 | 1800 | -0.765 | 1850 | -0.358 | 1900 | 0.206 | 1950 | -0.952 | 2000 | -1.780 |
| 1601 | -0.710 | 1651 | -1.188 | 1701 | 0.673 | 1751 | -1.830 | 1801 | -1.324 | 1851 | -0.390 | 1901 | -0.196 | 1951 | -1.553 | 2001 | -2.567 |
| 1602 | -1.975 | 1652 | -1.889 | 1702 | -0.278 | 1752 | -1.306 | 1802 | -2.827 | 1852 | -0.811 | 1902 | -3.049 | 1952 | -0.291 | 2002 | -1.328 |
| 1603 | -2.060 | 1653 | -1.706 | 1703 | -0.312 | 1753 | -1.604 | 1803 | -0.737 | 1853 | -0.807 | 1903 | -0.732 | 1953 | -0.127 | 2003 | -0.609 |
| 1604 | -1.039 | 1654 | -0.830 | 1704 | -1.481 | 1754 | -2.207 | 1804 | 0.892 | 1854 | -0.697 | 1904 | -0.856 | 1954 | -0.541 | 2004 | -1.380 |
| 1605 | -0.754 | 1655 | -0.338 | 1705 | -0.948 | 1755 | -1.059 | 1805 | 0.856 | 1855 | -0.561 | 1905 | -0.990 | 1955 | -0.467 | 2005 | 0.606 |
| 1606 | 0.039 | 1656 | 0.167 | 1706 | -1.425 | 1756 | -0.383 | 1806 | -0.117 | 1856 | -1.012 | 1906 | -0.449 | 1956 | -1.424 | 2006 | -0.839 |
| 1607 | 0.383 | 1657 | -0.554 | 1707 | -1.286 | 1757 | -0.407 | 1807 | 0.600 | 1857 | -0.315 | 1907 | 0.501 | 1957 | -0.890 | 2007 | 1.275 |
| 1608 | -0.240 | 1658 | -0.739 | 1708 | -0.967 | 1758 | -1.581 | 1808 | 0.166 | 1858 | -1.088 | 1908 | 1.025 | 1958 | 0.042 | 2008 | -0.326 |
| 1609 | -0.100 | 1659 | -0.710 | 1709 | -1.007 | 1759 | -1.001 | 1809 | -1.063 | 1859 | -0.763 | 1909 | -0.431 | 1959 | 0.938 | 2009 | 1.006 |
| 1610 | -0.375 | 1660 | -0.719 | 1710 | -0.597 | 1760 | -1.445 | 1810 | -0.142 | 1860 | -1.000 | 1910 | 0.174 | 1960 | -0.115 | 2010 | 2.431 |
| 1611 | -1.244 | 1661 | 0.193 | 1711 | -1.223 | 1761 | -1.344 | 1811 | -1.097 | 1861 | -1.839 | 1911 | 0.035 | 1961 | -0.727 | 2011 | -0.802 |
| 1612 | -0.839 | 1662 | -0.666 | 1712 | -1.661 | 1762 | -1.566 | 1812 | -0.834 | 1862 | -0.943 | 1912 | -0.997 | 1962 | -1.309 | 2012 | -1.266 |
| 1613 | -0.866 | 1663 | 0.089 | 1713 | -1.131 | 1763 | -0.505 | 1813 | -0.647 | 1863 | -1.566 | 1913 | -1.371 | 1963 | -0.139 | 2013 | -0.480 |
| 1614 | -0.395 | 1664 | 0.183 | 1714 | -0.939 | 1764 | -0.493 | 1814 | -0.462 | 1864 | -0.933 | 1914 | -1.090 | 1964 | -0.523 | 2014 | -0.524 |
| 1615 | -0.951 | 1665 | -0.030 | 1715 | -0.873 | 1765 | -0.967 | 1815 | -3.030 | 1865 | -1.445 | 1915 | -1.395 | 1965 | -0.229 | 2015 | 0.225 |
| 1616 | -0.252 | 1666 | -0.095 | 1716 | -1.352 | 1766 | 0.028 | 1816 | -0.693 | 1866 | -0.793 | 1916 | -1.118 | 1966 | 0.293 | 2016 | 0.431 |
| 1617 | 0.507 | 1667 | -0.205 | 1717 | -1.493 | 1767 | -0.452 | 1817 | -1.072 | 1867 | -0.884 | 1917 | -2.445 | 1967 | 0.587 |  |  |
| 1618 | -0.377 | 1668 | -0.107 | 1718 | -0.735 | 1768 | -1.166 | 1818 | -0.221 | 1868 | -0.632 | 1918 | -2.288 | 1968 | 0.342 |  |  |
| 1619 | -0.514 | 1669 | -0.530 | 1719 | -1.060 | 1769 | -0.761 | 1819 | -1.035 | 1869 | -0.297 | 1919 | -1.384 | 1969 | 0.155 |  |  |
| 1620 | 0.112 | 1670 | 0.342 | 1720 | -0.689 | 1770 | 0.171 | 1820 | -1.937 | 1870 | -1.407 | 1920 | -1.165 | 1970 | -1.472 |  |  |
| 1621 | 0.286 | 1671 | 0.251 | 1721 | -0.126 | 1771 | 0.053 | 1821 | -0.977 | 1871 | -1.603 | 1921 | -1.249 | 1971 | -2.726 |  |  |
| 1622 | -0.600 | 1672 | -0.334 | 1722 | -0.403 | 1772 | -0.400 | 1822 | -0.999 | 1872 | -1.104 | 1922 | 0.032 | 1972 | -0.808 |  |  |
| 1623 | 0.332 | 1673 | -0.060 | 1723 | -0.511 | 1773 | -0.876 | 1823 | -0.093 | 1873 | -1.004 | 1923 | 1.149 | 1973 | 0.196 |  |  |
| 1624 | -0.757 | 1674 | -1.333 | 1724 | -1.470 | 1774 | -1.071 | 1824 | -0.230 | 1874 | -0.932 | 1924 | 1.951 | 1974 | 0.429 |  |  |
| 1625 | -0.117 | 1675 | -0.906 | 1725 | -1.345 | 1775 | -1.724 | 1825 | -0.707 | 1875 | 0.063 | 1925 | 0.087 | 1975 | 0.487 |  |  |
| 1626 | -0.664 | 1676 | -1.064 | 1726 | -1.968 | 1776 | -1.300 | 1826 | -0.396 | 1876 | 0.371 | 1926 | 0.747 | 1976 | -0.374 |  |  |
| 1627 | -0.852 | 1677 | -1.637 | 1727 | -1.318 | 1777 | -0.406 | 1827 | -0.342 | 1877 | -0.115 | 1927 | -0.996 | 1977 | -1.642 |  |  |
| 1628 | -0.609 | 1678 | -1.112 | 1728 | -1.393 | 1778 | -1.550 | 1828 | -0.487 | 1878 | 0.426 | 1928 | -0.641 | 1978 | -1.696 |  |  |
| 1629 | -0.435 | 1679 | -1.334 | 1729 | -0.749 | 1779 | -0.547 | 1829 | -0.920 | 1879 | -1.012 | 1929 | -1.675 | 1979 | -0.752 |  |  |
| 1630 | -1.197 | 1680 | -0.125 | 1730 | -1.573 | 1780 | -0.895 | 1830 | -0.684 | 1880 | -1.578 | 1930 | 0.082 | 1980 | -1.311 |  |  |
| 1631 | -0.844 | 1681 | -0.560 | 1731 | -1.284 | 1781 | -0.154 | 1831 | -1.125 | 1881 | -2.197 | 1931 | 1.037 | 1981 | -0.512 |  |  |
| 1632 | -0.195 | 1682 | 0.137 | 1732 | -0.943 | 1782 | -1.771 | 1832 | -1.339 | 1882 | -1.301 | 1932 | 0.280 | 1982 | -2.612 |  |  |
| 1633 | -0.120 | 1683 | -1.011 | 1733 | -0.936 | 1783 | -0.861 | 1833 | -1.554 | 1883 | -0.903 | 1933 | -0.382 | 1983 | -1.949 |  |  |
| 1634 | -0.589 | 1684 | 0.126 | 1734 | -0.502 | 1784 | -1.442 | 1834 | -0.837 | 1884 | -0.478 | 1934 | 0.096 | 1984 | -1.475 |  |  |
| 1635 | -0.181 | 1685 | -0.088 | 1735 | -0.585 | 1785 | -2.755 | 1835 | -1.549 | 1885 | -0.234 | 1935 | -0.399 | 1985 | -3.859 |  |  |
| 1636 | -0.207 | 1686 | 0.521 | 1736 | -0.548 | 1786 | -1.714 | 1836 | -1.081 | 1886 | -0.341 | 1936 | -0.513 | 1986 | -1.657 |  |  |
| 1637 | -0.381 | 1687 | 0.360 | 1737 | -1.086 | 1787 | -1.982 | 1837 | -0.226 | 1887 | -0.970 | 1937 | -0.901 | 1987 | -0.113 |  |  |
| 1638 | -0.345 | 1688 | 1.621 | 1738 | -1.164 | 1788 | -1.503 | 1838 | -0.602 | 1888 | -0.910 | 1938 | -0.959 | 1988 | -0.042 |  |  |
| 1639 | -0.400 | 1689 | 1.020 | 1739 | -0.921 | 1789 | -0.366 | 1839 | -0.449 | 1889 | -0.124 | 1939 | -0.585 | 1989 | -0.860 |  |  |
| 1640 | -0.906 | 1690 | 1.283 | 1740 | -0.655 | 1790 | -1.638 | 1840 | 0.190 | 1890 | -0.527 | 1940 | -0.237 | 1990 | -1.249 |  |  |
